# Supplementary material for: Growth patterns of caudal fin rays are informed by both external signals from the regenerating organ and remembered identity autonomous to the local tissue
Source: PubMed Central journal article supplement — bioRxiv. 2024 Jul 11:2024.03.29.586899. Originally published 2024 Mar 31. Preprint. [Version 2] doi: 10.1101/2024.03.29.586899 (PMC10996721; doi:10.1101/2024.03.29.586899), 2024-07-11
Supplement: NIHPP2024.03.29.586899v1-supplement-1.pdf [file NIHPP2024.03.29.586899v1-supplement-1.pdf]

# SUPPLEMENTARY FIGURES

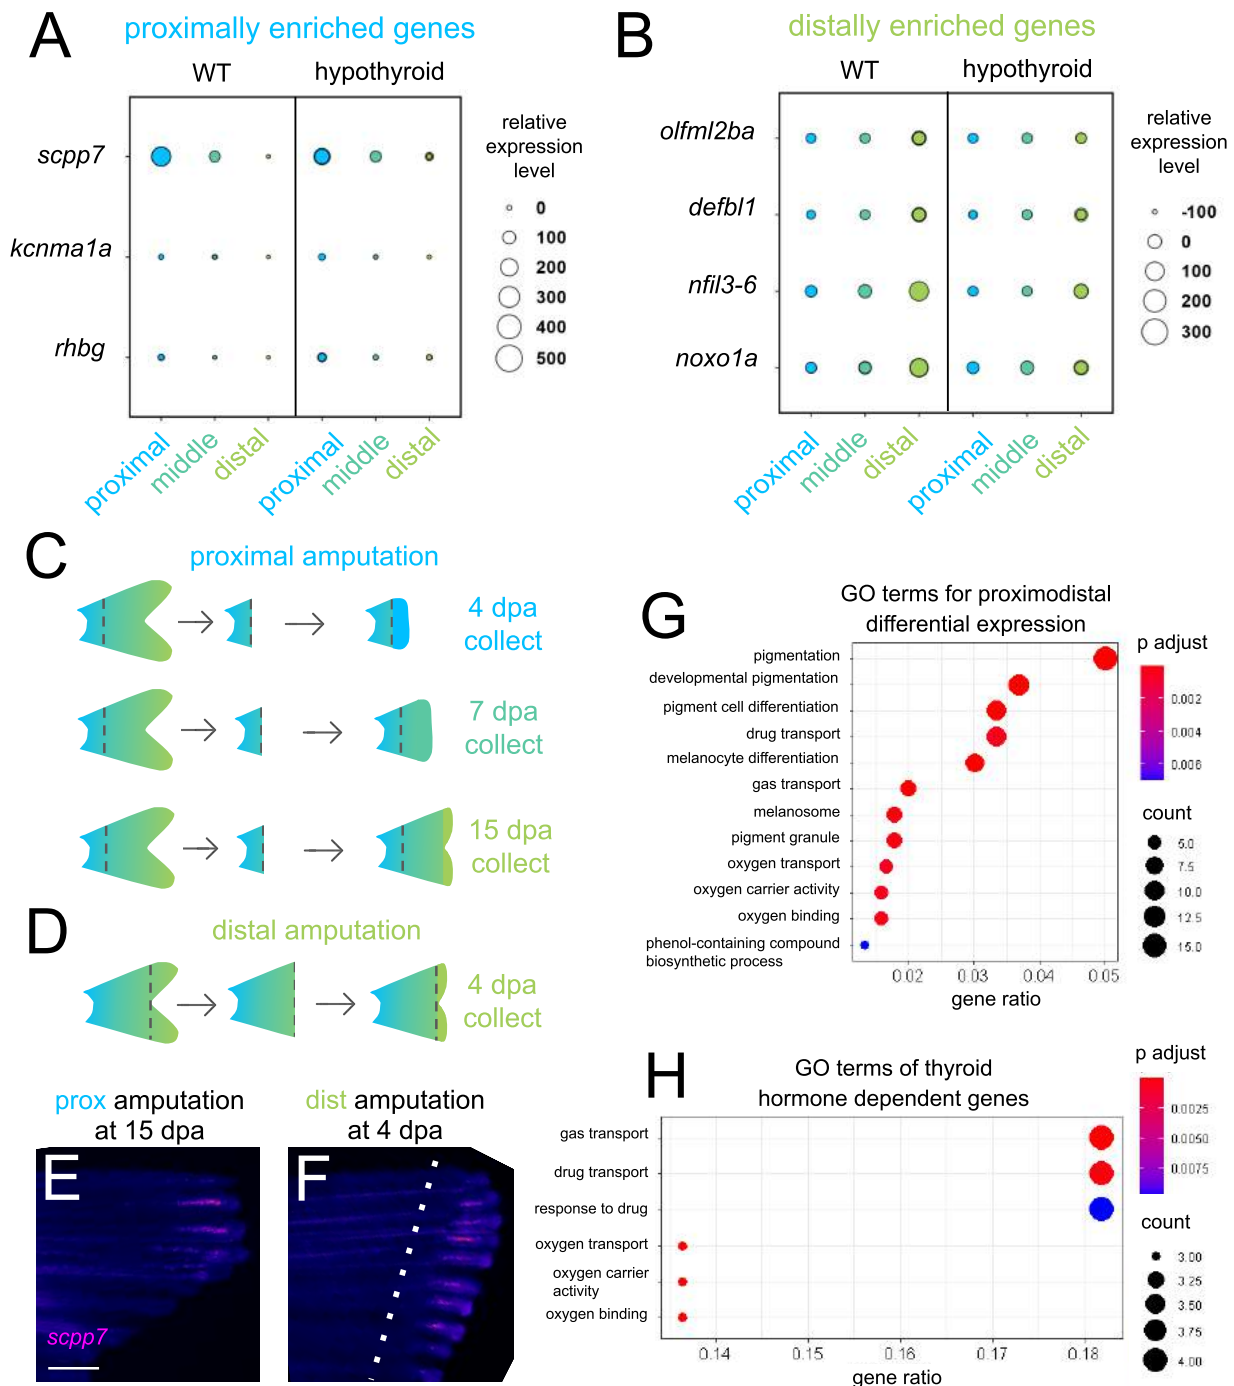

**Supplementary Figure 1. Differentially expressed gene candidates for fluorescent *in situ* hybridization.** Thyroid hormone-dependent gene candidates that are either (A) proximally enriched or (B) distally enriched in WT tissues. Custom RNAscope probes were made and tested for all genes, but only the *scpp7* probe showed specific staining. (C-D) Schematic

showing sample collection with (C) proximal or (D) distal amputation. (E) Proximally amputated at 15dpa or (F) distally amputated 4dpa tissue stained for *scpp7*. Amputation plane, dashed line. Warm colors indicate highest regions of expression. (G) GO enrichment of the 489 genes proximodistal differentially expressed in WT. (H) GO enrichment of the 45 genes that were thyroid hormone dependent and proximodistal differentially expressed in WT. Scale bar, 400  $\mu$ m.

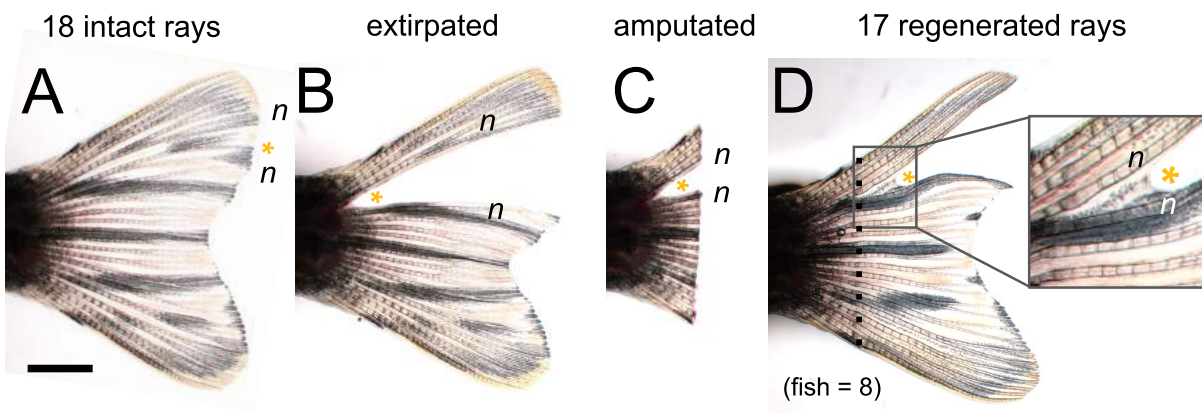

**Supplementary Figure 2. Regeneration does not originate from an extirpated ray.** (A) Intact fin with 18 rays, dorsal ray 4 (D4) marked with yellow asterisk. (B) Fin one day post D4 extirpation. (C) Freshly amputated fin, one day post D4 extirpation. (D) Fin regenerates with 17 rays (one-less ray than original, intact fin). n indicates neighboring dorsal rays 3 and 5. Amputation plane, dashed line. Scale bar, 2 mm.

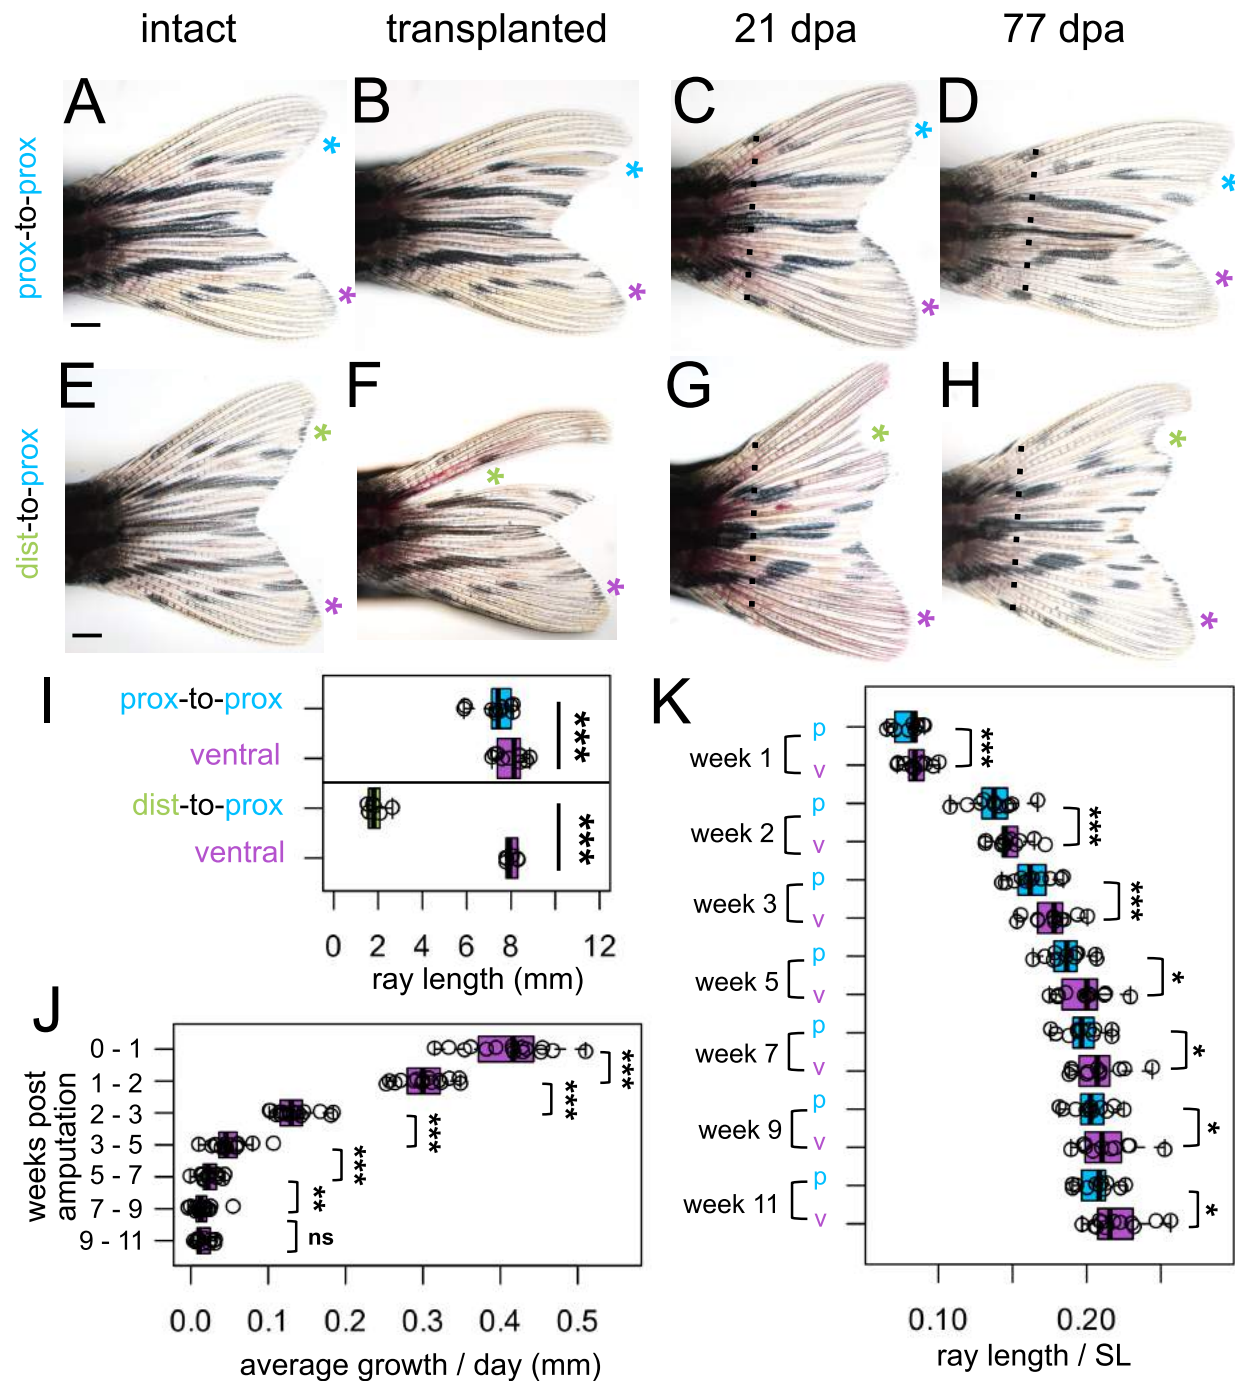

**Supplementary Figure 3. Non-transplanted rays regenerated faster than transplanted rays.** Fins of (A-D) proximal-to-proximal (blue asterisk) or (E-H) distal-to-proximal (green asterisk) transplantation: (A, E) intact pre-transplantation, (B-F) one day post-transplantation, (C-G) regenerating at 21 dpa, (D, H) regenerating at 77 dpa. Ventral rays indicated with purple asterisks. Amputation plane, dashed line. (I) Length of the rays after transplantation, as measured from the peduncle. (J) Average amount of growth per day during a one/two week periods for all the ventral ray comparisons. (K) Prox-to-prox rays versus ventral ray

comparisons, ray length (measured from amputation plane) divided by SL at each week. Significance determined by paired Welch two-sample t tests. Scale bar, 1 mm.

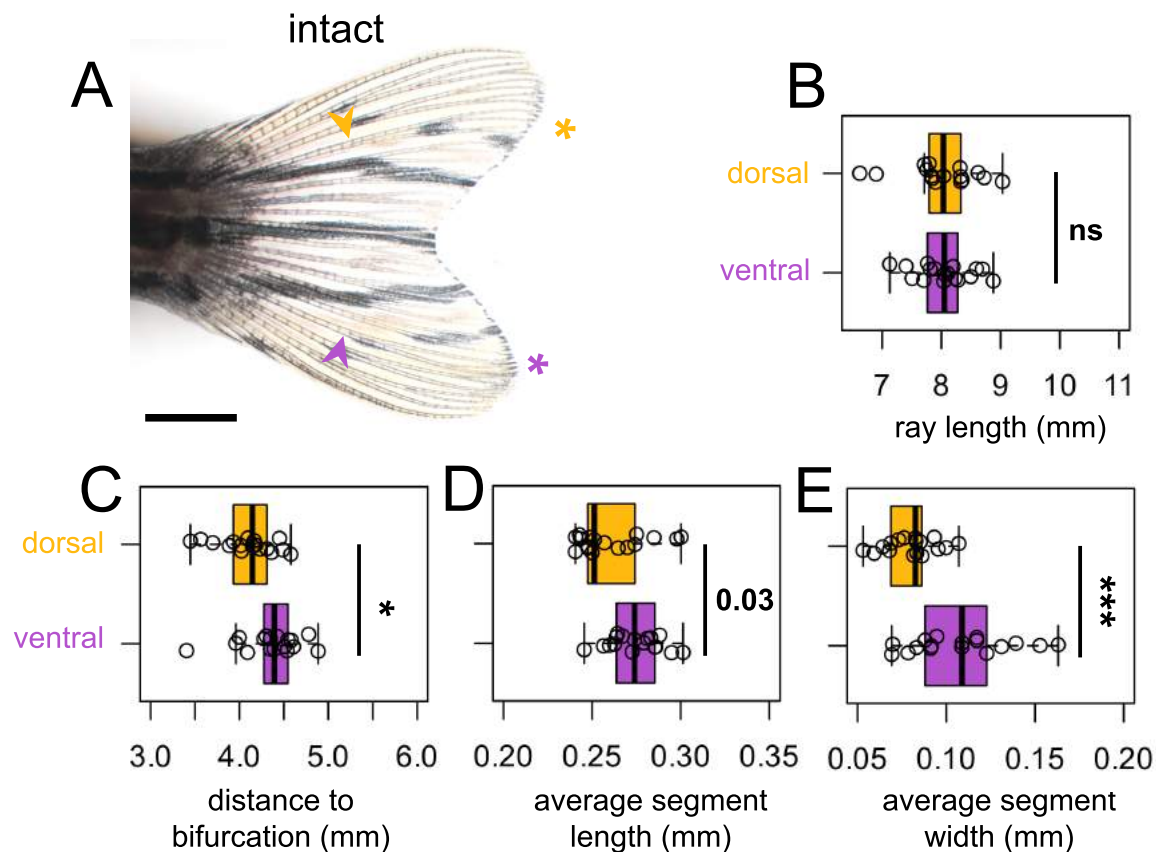

**Supplementary Figure 4. Dorsal ray patterning is unique from ventral ray patterning.** (A) Intact fin. A yellow or purple asterisk indicates dorsal ray 4 or ventral ray 4, respectively. Arrowheads, primary bifurcations. Boxplots showing the (B) total length of the ray, (C) proximodistal position of the bifurcation, (D) average segment length, and (E) average segment width measured from a set distance from the peduncle. Significance determined by a paired Welch two-sample t test. Scale bar, 2 mm.

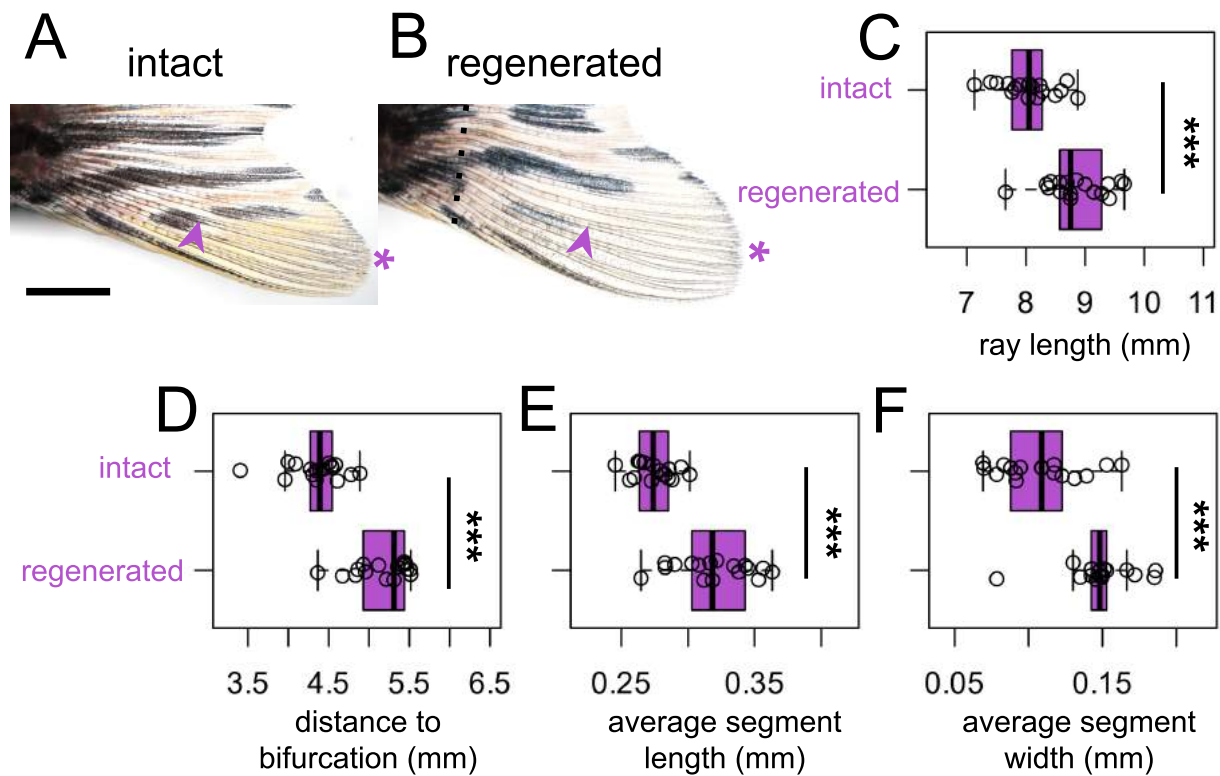

**Supplementary Figure 5. Intact and regenerated ray patterning are different.** (A-B) Ventral lobe of (A) intact or (B) regenerating fin at 35dpa. Purple asterisks indicate ventral ray 4. Arrowheads, primary bifurcations. Amputation plane, dashed line. Boxplots showing the (C) total length of the ray, (D) proximodistal position of the bifurcation, (E) average segment length, and (F) average segment width measured from a set distance from the peduncle. Significance determined by a paired Welch two-sample t test. Scale bar, 2 mm.

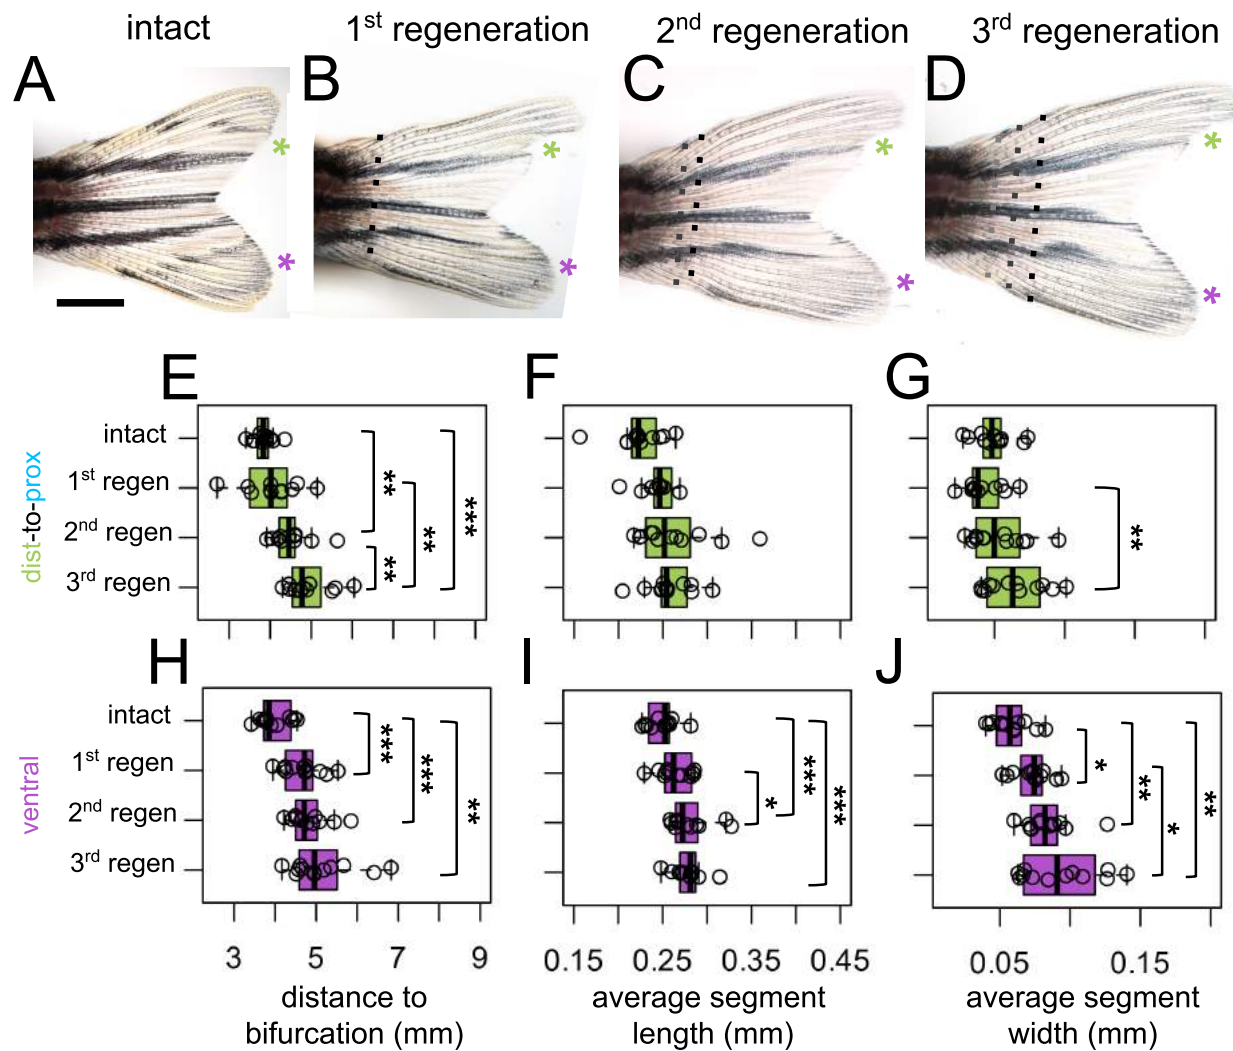

**Supplementary Figure 6. Regenerative ray patterning differs from previous regenerated morphology.** (A) Intact fin. (B-D) Regenerating fin after distal-to-proximal transplantation: (B) 28 days post first amputation, (C) 28 days post second amputation, (C) 28 days post third amputation. Green or purple asterisks indicate dist-to-prox or ventral ray, respectively. Black dashed line, most recent amputation. Grey dashed lines, previous amputation planes. (E, H) Boxplots showing the proximodistal position of the bifurcation. Note that bifurcations form at increasingly distal location after each amputation, as previously described. Boxplots showing (F, I) average segment length, and (G, J) average segment width. All measurements were taken from a set distance from the peduncle. Significance determined by paired repeated samples ANOVA followed by pairwise t tests. Scale bar, 2 mm.

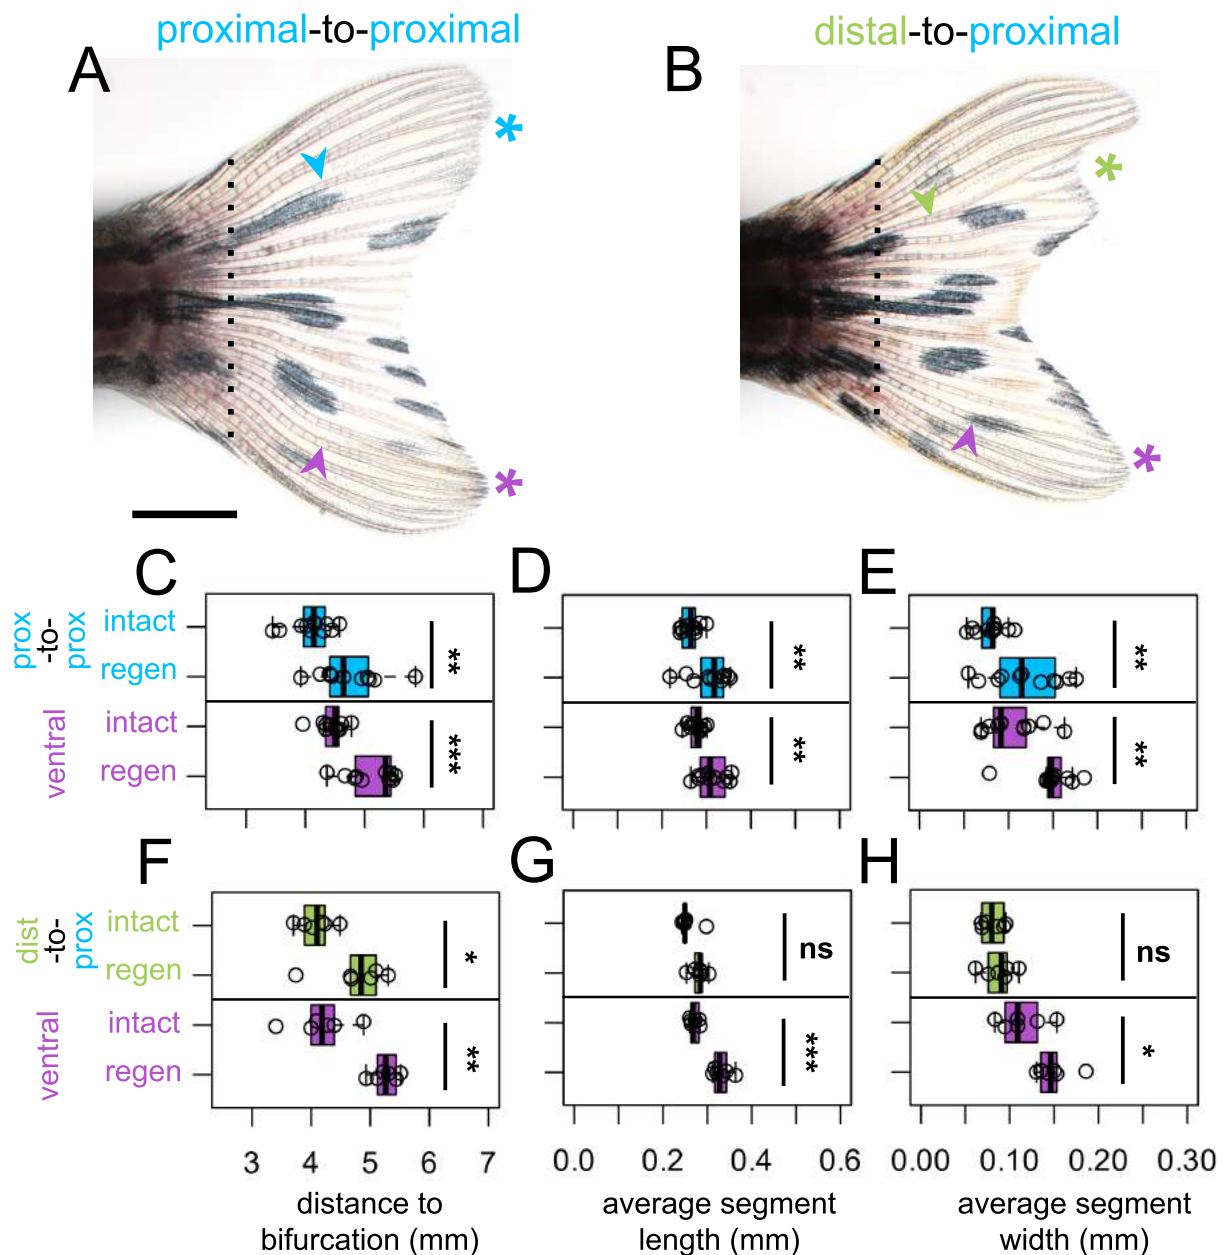

**Supplementary Figure 7. Proximodistal patterning is dependent upon the current regenerative environment.** Regenerating fins at 35dpa after either (A) proximal-to-proximal (blue asterisk) or (B) distal-to-proximal (green asterisk) transplantation. Purple asterisks indicate ventral ray comparison. Amputation plane shown with dashed line. Arrowheads indicate primary bifurcations. C-H) Boxplots showing the (C, F) proximodistal position of the bifurcation, (D, G) average segment length, and (E, H) average segment width of intact or regenerated rays, measured from a set distance from the peduncle. (C-E) Prox-to-prox or dist-to-prox ray measurements are shown alongside their ventral ray comparisons. Significance determined by a paired Welch two-sample t test. Scale bar, (A-B) 2 mm.

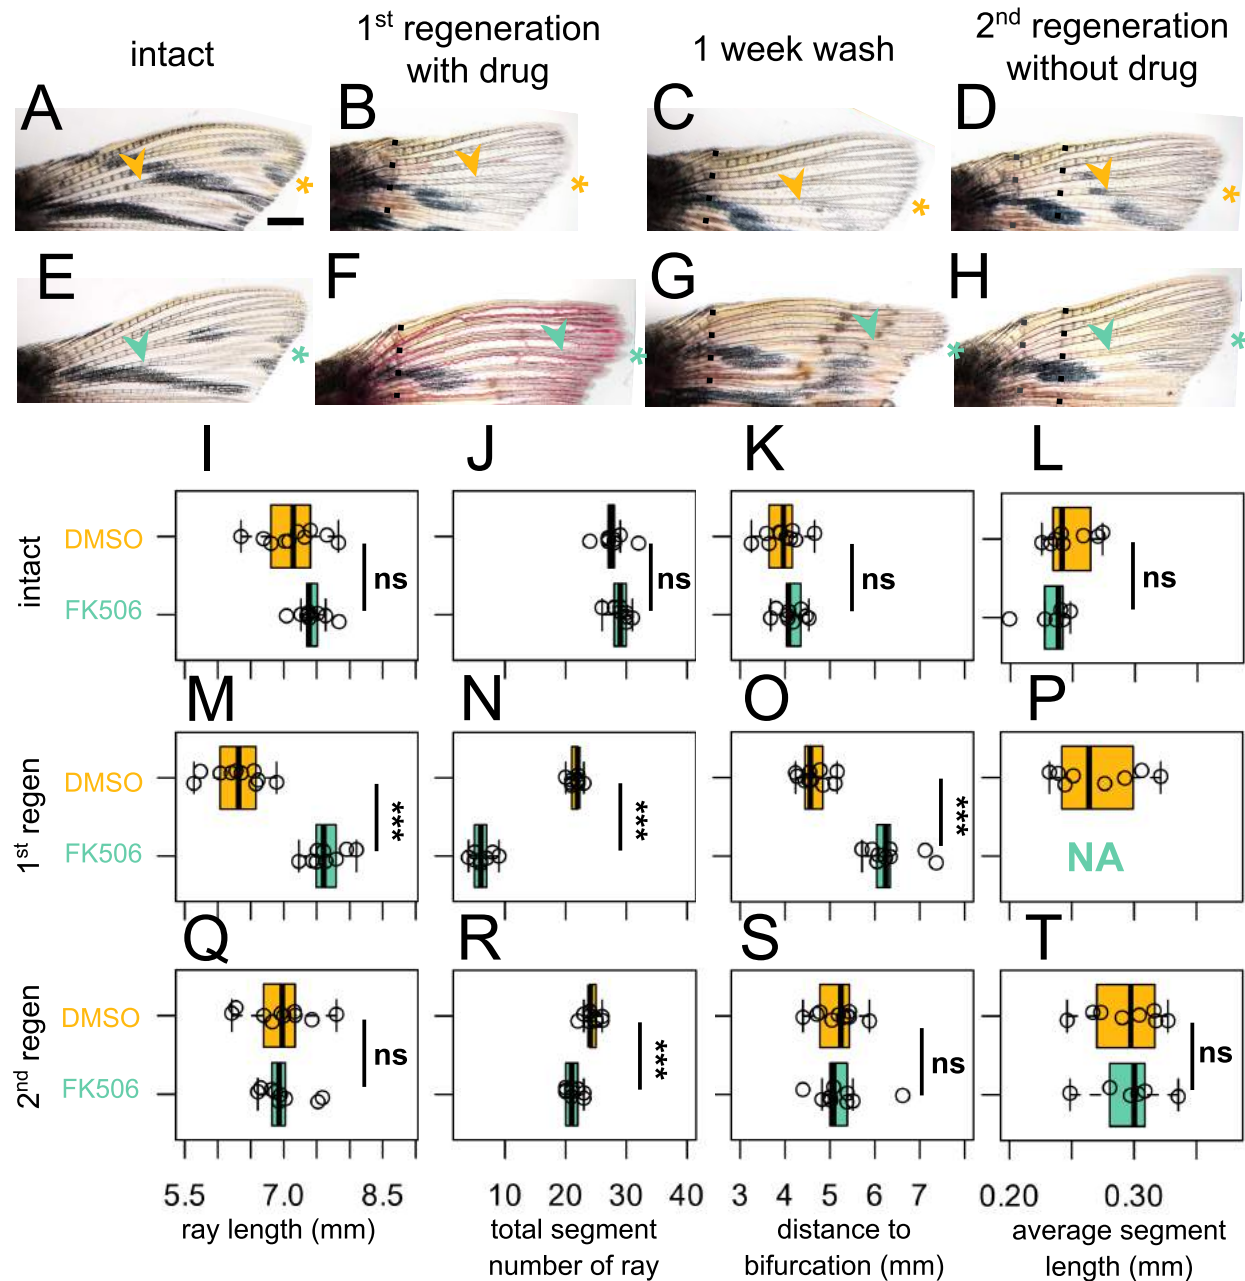

rays were built from only ~5 segments, making segments lengths so long that none were contained by the standard region of interest measured. Significance determined by unpaired Welch two-sample t test. Scale bar, 1 mm.
